# Supplementary material for: Reagent-Free Colorimetric Assay for Galactose Using Agarose Gel Entrapping Nanoceria and Galactose Oxidase
Source: MDPI journal article supplement (doi:10.3390/nano10050895), 2020-05-08
Supplement: s1 [file s1]

Supplementary Materials

# Reagent-Free Colorimetric Assay for Galactose Using Agarose Gel Entrapping Nanoceria and Galactose Oxidase

Phuong Thy Nguyen, Hee Tae Ahn and Moon Il Kim \*

Department of BioNano Technology, Gachon University, 1342 Seongnamdae-ro, Sujeong-gu, Seongnam, Gyeonggi 13120, Korea; nnphuongthy18@gmail.com (P.T.N.); venice4@naver.com (H.T.A.)

\* Correspondence: moonil@gachon.ac.kr; Tel.: +82-31-750-8563

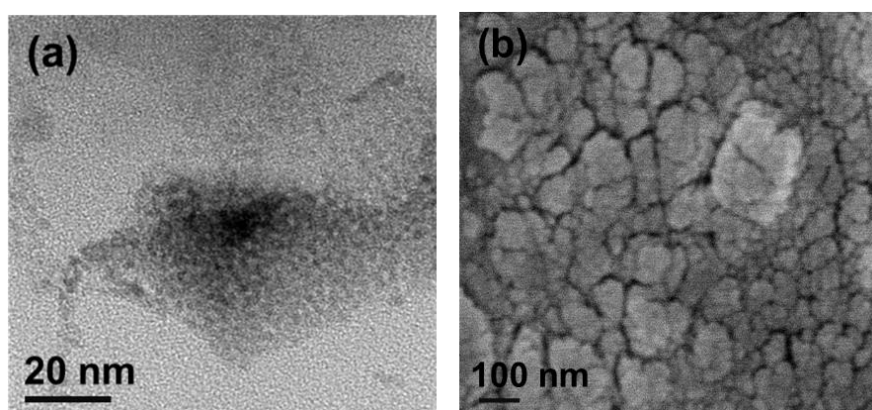

**Figure S1.** (a) TEM and (b) SEM images of agarose\_nanoceria.

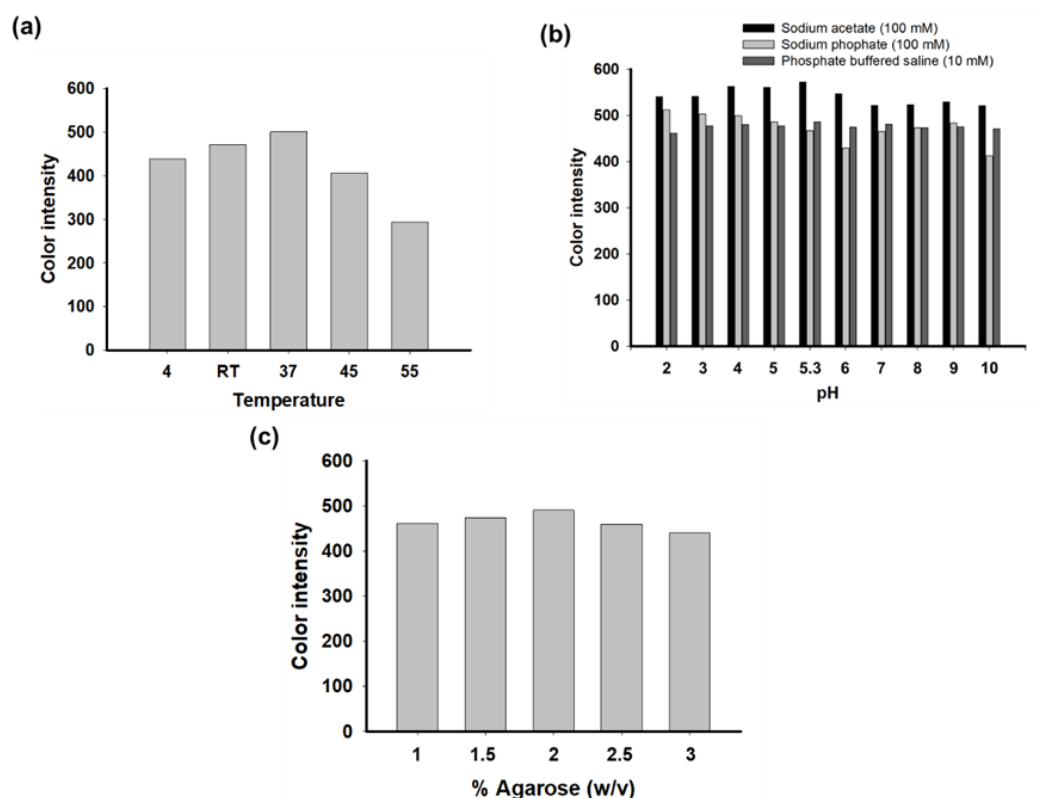

**Figure S2.** Effects of (a) temperature, (b) buffer system (pH and composition), and (c) gel density on the level of color intensity for the detection of  $H_2O_2$ .

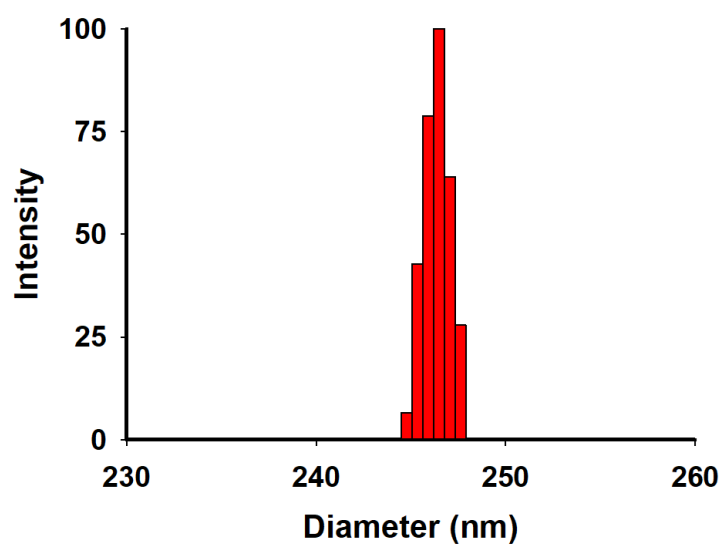

**Figure S3.** Hydrodynamic size distributions of free nanoceria measured by DLS.

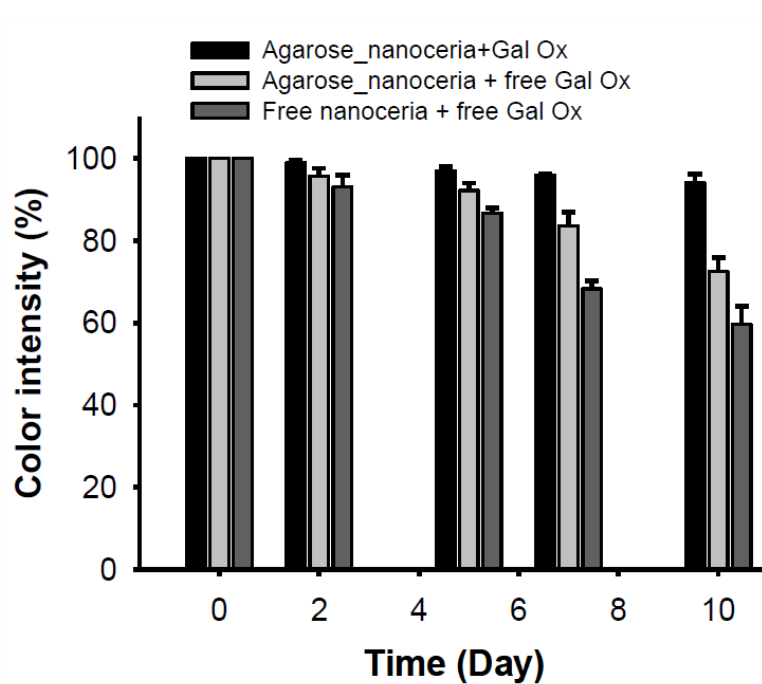

**Figure S4.** Stability of agarose\_nanoceria+Gal Ox and free Gal Ox in the presence of either agarose\_nanoceria or free nanoceria. Samples were incubated in aqueous buffer (100 mM sodium acetate, pH 5.3) at RT under static conditions and the error bars represent the standard deviation of three independent measurements.

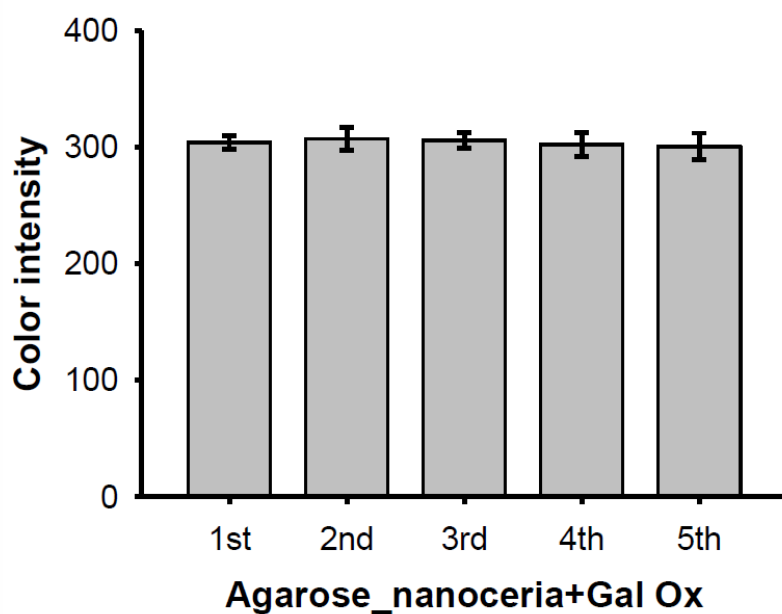

**Figure S5.** Color intensity toward 10 mM galactose using agarose\_nanoceria+Gal Ox composites prepared from 5 different synthetic batches.

**Table S1.** An overview on the essential assay attributes of optical determination of galactose.

| Required reagent                                                               | Detection method | Reaction time (h) | Linear range ( $\mu\text{M}$ ) | LOD ( $\mu\text{M}$ ) | Estimated cost | Stability  | Ref.      |
|--------------------------------------------------------------------------------|------------------|-------------------|--------------------------------|-----------------------|----------------|------------|-----------|
| Resazurin                                                                      | Fluorescence     | 4                 | 1-1000                         | 5                     | High           | Not tested | [S1]      |
| Amplex UltraRed                                                                | Fluorescence     | 0.5               | 2-80                           | 2                     | Medium         | Not tested | [S2]      |
| 3,3',5,5'-tetramethylbenzidine (TMB)                                           | Colorimetry      | 3                 | 10-20,000                      | 3                     | Low            | Not tested | [S3]      |
| 2-(p-iodophenyl)-3-(p-nitrophenyl)-5-phenyltetrazolium chloride (INT)          | Colorimetry      | 0.75              | 27.8-2780                      | 27.8                  | Medium         | Not tested | [S4]      |
| 2,20-Azino-bis(3-ethylbenzo-thiazoline-6-sulfonic acid) diammonium salt (ABTS) | Colorimetry      | 0.67              | 55.6-1111                      | 27.8                  | Low            | ~20 days   | [13]      |
| Reagent-free                                                                   | Colorimetry      | 0.5               | 100-1500                       | 50                    | Low            | ~10 days   | This work |

## References

- S1. Shapiro, F.; Silanikove, N. Rapid and accurate determination of D-and L-lactate, lactose and galactose by enzymatic reactions coupled to formation of a fluorochromophore: Applications in food quality control. *Food Chem.* **2010**, *119*, 829–833.
- S2. Liu, C.H.; Tseng, W.L. Oxidase-functionalized Fe<sub>3</sub>O<sub>4</sub> nanoparticles for fluorescence sensing of specific substrate. *Anal. Chim. Acta* **2011**, *703*, 87–93.
- S3. Li, M.; Yang, J.; Ou, Y.; Shi, Y.; Liu, L.; Sun, C.; Zheng, H.; Long, Y. Peroxidase-like activity of 2',7'-difluorofluorescein and its application for galactose detection. *Talanta* **2018**, *182*, 422–427.
- S4. Kianmehr, A.; Mahrooz, A.; Ansari, J.; Oladnabi, M.; Shahbazmohammadi, H. The rapid and sensitive quantitative determination of galactose by combined enzymatic and colorimetric method: application in neonatal screening. *Appl. Biochem. Biotechnol.* **2016**, *179*, 283–293.

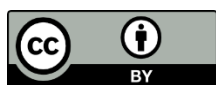

© 2020 by the authors. Submitted for possible open access publication under the terms and conditions of the Creative Commons Attribution (CC BY) license (<http://creativecommons.org/licenses/by/4.0/>).
